# Supplementary material for: Potential use of essential oils from Origanum vulgare and Syzygium aromaticum to control Tetranychus urticae Koch (Acari: Tetranychidae) on two host plant species
Source: PeerJ. 2023 Jan 20;11:e14475. doi: 10.7717/peerj.14475 (PMC9869773; doi:10.7717/peerj.14475)
Supplement: Supplemental Information 1 [file peerj-11-14475-s001.xlsx]

## Sheet: Origanum vulgare
				KI
RT		MM	M/Z	Ri1	Ri2
13.158	alpha-Pinene	136	93.1	1027	1025
13.304	alpha-Thujene	136	93.1	1030	1027
19.368	Myrcene	136	93.1	1167	1161
20.216	alpha-Terpinene	136	121.1	1186	1178
23.124	gamma-Terpinene	136	93.1	1252	1245
24.218	para-Cymene	134	119.1	1278	1270
31.274	cis-Sabinene hydrate	154	71	1464	1460
33.848	Linalool	154	71	1541	1543
35.968	Terpinen-4-ol	154	71.1	1611	1601
36.208	beta-Caryophyllene	204	93.1	1616	1599
38.95	Borneol	154	95.1	1711	1700
39.734	beta-Bisabolene	204	69.1	1735	1728
42.211	Dipropylene glycol	134	45.1	1842
47.063	Caryophyllene oxide	220	79.1	2013	1986
51.157	Thymol	150	135.1	2184	2164
51.986	Carvacrol	150	135.2	2216	2211

## Sheet: Syzgium aromaticum
RT		MM	M/Z	Ri1	Ri2
36.21	beta-Caryophyllene	204	93.1	1616	1599
38.424	alpha-Humulene	204	93.1	1690	1667
42.201	Dipropylene glycol	134	45.1	1825
47.063	Caryophyllene oxide	220	79.1	2013	1986
51.07	Eugenol	164	164	2180	2163
