# Supplementary material for: Potential use of essential oils from Origanum vulgare and Syzygium aromaticum to control Tetranychus urticae Koch (Acari: Tetranychidae) on two host plant species
Source: PeerJ. 2023 Jan 20;11:e14475. doi: 10.7717/peerj.14475 (PMC9869773; doi:10.7717/peerj.14475)
Supplement: Supplemental Information 2 [file peerj-11-14475-s002.xlsx]

## Sheet: Sayfa6
Oregano bean 1 hour later					Oregano bean 4 hours later				Oregano bean 8 hours later				Oregano bean 24 hours later					Oregano bean 72 hours later					Oregano bean 120 hours later
	Cont.	death	death	alive	Cont.	death	death	alive	Cont.	death	death	alive	Cont.	death	death	alive		Cont.	death	death	alive		Cont.	death	death	alive
	0.05	29	2.9	7.1	0.05	60	6	4	0.05	78	7.8	2.2	0.05	80	8	2		0.05	100	10	0		0.05	100	10	0
	0.05	28	2.8	7.2	0.05	65	6.5	3.5	0.05	94.5	9.45	0.55	0.05	96.9	9.69	0.31		0.05	100	10	0		0.05	100	10	0
	0.05	39.6	3.96	6.04	0.05	75	7.5	2.5	0.05	94.5	9.45	0.55	0.05	96.9	9.69	0.31		0.05	100	10	0		0.05	100	10	0
	0.05	25	2.5	7.5	0.05	78	7.8	2.2	0.05	80	8	2	0.05	96.9	9.69	0.31		0.05	100	10	0		0.05	100	10	0
	0.05	25	2.5	7.5	0.05	78	7.8	2.2	0.05	81	8.1	1.9	0.05	87	8.7	1.3		0.05	100	10	0		0.05	100	10	0
	0.05	24	2.4	7.6	0.05	60	6	4	0.05	80	8	2	0.05	89	8.9	1.1		0.05	100	10	0		0.05	100	10	0
	0.05	30	3	7	0.05	62	6.2	3.8	0.05	82	8.2	1.8	0.05	85	8.5	1.5		0.05	100	10	0		0.05	100	10	0
	0.05	35	3.5	6.5	0.05	65	6.5	3.5	0.05	90	9	1	0.05	84	8.4	1.6		0.05	100	10	0		0.05	100	10	0
	0.05	40	4	6	0.05	75	7.5	2.5	0.05	89	8.9	1.1	0.05	83	8.3	1.7		0.05	100	10	0		0.05	100	10	0
	0.05	41	4.1	5.9	0.05	70	7	3	0.05	85	8.5	1.5	0.05	85	8.5	1.5		0.05	100	10	0		0.05	100	10	0
	2.5%	0	0	10	2.5%	50	5	5	2.5%	55	5.5	4.5	2.5%	72	7.2	2.8		2.5%	81	8.1	1.9		2.5%	90	9	1
	2.5%	0	0	10	2.5%	60	6	4	2.5%	62	6.2	3.8	2.5%	75	7.5	2.5		2.5%	85	8.5	1.5		2.5%	92	9.2	0.8
	2.5%	0	0	10	2.5%	42	4.2	5.8	2.5%	60	6	4	2.5%	74	7.4	2.6		2.5%	85	8.5	1.5		2.5%	91	9.1	0.9
	2.5%	0	0	10	2.5%	45	4.5	5.5	2.5%	59	5.9	4.1	2.5%	75	7.5	2.5		2.5%	86	8.6	1.4		2.5%	95	9.5	0.5
	2.5%	0	0	10	2.5%	48	4.8	5.2	2.5%	58	5.8	4.2	2.5%	71	7.1	2.9		2.5%	90	9	1		2.5%	94	9.4	0.6
	2.5%	0	0	10	2.5%	40	4	6	2.5%	55	5.5	4.5	2.5%	68	6.8	3.2		2.5%	92	9.2	0.8		2.5%	87	8.7	1.3
	2.5%	0	0	10	2.5%	35	3.5	6.5	2.5%	48	4.8	5.2	2.5%	69	6.9	3.1		2.5%	88	8.8	1.2		2.5%	88	8.8	1.2
	2.5%	0	0	10	2.5%	29	2.9	7.1	2.5%	50	5	5	2.5%	65	6.5	3.5		2.5%	87	8.7	1.3		2.5%	89	8.9	1.1
	2.5%	0	0	10	2.5%	38	3.8	6.2	2.5%	52	5.2	4.8	2.5%	68	6.8	3.2		2.5%	85	8.5	1.5		2.5%	91	9.1	0.9
	2.5%	0	0	10	2.5%	45	4.5	5.5	2.5%	50	5	5	2.5%	72	7.2	2.8		2.5%	85	8.5	1.5		2.5%	88	8.8	1.2
	0.01	0	0	10	0.01	20	2	8	0.01	37.12	3.712	6.288	0.01	19.04	1.904	8.096		0.01	52	5.2	4.8		0.01	85	8.5	1.5
	0.01	0	0	10	0.01	15	1.5	8.5	0.01	18.56	1.856	8.144	0.01	38.08	3.808	6.192		0.01	55	5.5	4.5		0.01	82	8.2	1.8
	0.01	0	0	10	0.01	19	1.9	8.1	0.01	37.12	3.712	6.288	0.01	40	4	6		0.01	56	5.6	4.4		0.01	83	8.3	1.7
	0.01	0	0	10	0.01	21	2.1	7.9	0.01	20	2	8	0.01	57.12	5.712	4.288		0.01	58	5.8	4.2		0.01	85	8.5	1.5
	0.01	0	0	10	0.01	20	2	8	0.01	40	4	6	0.01	38.08	3.808	6.192		0.01	60	6	4		0.01	86	8.6	1.4
	0.01	0	0	10	0.01	21	2.1	7.9	0.01	37.12	3.712	6.288	0.01	55	5.5	4.5		0.01	62	6.2	3.8		0.01	90	9	1
	0.01	0	0	10	0.01	18	1.8	8.2	0.01	37.12	3.712	6.288	0.01	50	5	5		0.01	55	5.5	4.5		0.01	95	9.5	0.5
	0.01	0	0	10	0.01	19	1.9	8.1	0.01	12.84	1.284	8.716	0.01	25	2.5	7.5		0.01	50	5	5		0.01	92	9.2	0.8
	0.01	0	0	10	0.01	20	2	8	0.01	25.68	2.568	7.432	0.01	20	2	8		0.01	52	5.2	4.8		0.01	87	8.7	1.3
	0.01	0	0	10	0.01	20	2	8	0.01	25.68	2.568	7.432	0.01	20	2	8		0.01	51	5.1	4.9		0.01	88	8.8	1.2
	0.1%	0	0	10	0.1%	10	1	9	0.1%	15	1.5	8.5	0.1%	14.28	1.428	8.572		0.1%	26.92	2.692	7.308		0.1%	50	5	5
	0.1%	0	0	10	0.1%	5	0.5	9.5	0.1%	9	0.9	9.1	0.1%	28.56	2.856	7.144		0.1%	40.38	4.038	5.962		0.1%	55	5.5	4.5
	0.1%	0	0	10	0.1%	6	0.6	9.4	0.1%	10	1	9	0.1%	28.56	2.856	7.144		0.1%	26.92	2.692	7.308		0.1%	56	5.6	4.4
	0.1%	0	0	10	0.1%	10	1	9	0.1%	12	1.2	8.8	0.1%	14.28	1.428	8.572		0.1%	26.92	2.692	7.308		0.1%	58	5.8	4.2
	0.1%	0	0	10	0.1%	12	1.2	8.8	0.1%	15	1.5	8.5	0.1%	15	1.5	8.5		0.1%	26.92	2.692	7.308		0.1%	62	6.2	3.8
	0.1%	0	0	10	0.1%	11	1.1	8.9	0.1%	16	1.6	8.4	0.1%	16	1.6	8.4		0.1%	26.92	2.692	7.308		0.1%	65	6.5	3.5
	0.1%	0	0	10	0.1%	10	1	9	0.1%	12	1.2	8.8	0.1%	14	1.4	8.6		0.1%	28	2.8	7.2		0.1%	60	6	4
	0.1%	0	0	10	0.1%	10	1	9	0.1%	12	1.2	8.8	0.1%	13	1.3	8.7		0.1%	30	3	7		0.1%	61	6.1	3.9
	0.1%	0	0	10	0.1%	9	0.9	9.1	0.1%	11	1.1	8.9	0.1%	15	1.5	8.5		0.1%	32	3.2	6.8		0.1%	60	6	4
	0.1%	0	0	10	0.1%	8	0.8	9.2	0.1%	13	1.3	8.7	0.1%	15	1.5	8.5		0.1%	35	3.5	6.5		0.1%	63	6.3	3.7
	0.05%	0	0	10	0.05%	0	0	10	0.05%	0	0	10	0.05%	0	0	10		0.05%	5	0.5	9.5		0.05%	15	1.5	8.5
	0.05%	0	0	10	0.05%	0	0	10	0.05%	0	0	10	0.05%	0	0	10		0.05%	8	0.8	9.2		0.05%	20	2	8
	0.05%	0	0	10	0.05%	0	0	10	0.05%	0	0	10	0.05%	0	0	10		0.05%	10	1	9		0.05%	21	2.1	7.9
	0.05%	0	0	10	0.05%	0	0	10	0.05%	0	0	10	0.05%	0	0	10		0.05%	5	0.5	9.5		0.05%	20	2	8
	0.05%	0	0	10	0.05%	0	0	10	0.05%	0	0	10	0.05%	0	0	10		0.05%	6	0.6	9.4		0.05%	18	1.8	8.2
	0.05%	0	0	10	0.05%	0	0	10	0.05%	0	0	10	0.05%	0	0	10		0.05%	7	0.7	9.3		0.05%	19	1.9	8.1
	0.05%	0	0	10	0.05%	0	0	10	0.05%	0	0	10	0.05%	0	0	10		0.05%	8	0.8	9.2		0.05%	20	2	8
	0.05%	0	0	10	0.05%	0	0	10	0.05%	0	0	10	0.05%	0	0	10		0.05%	11	1.1	8.9		0.05%	20	2	8
	0.05%	0	0	10	0.05%	0	0	10	0.05%	0	0	10	0.05%	0	0	10		0.05%	10	1	9		0.05%	21	2.1	7.9
	0.05%	0	0	10	0.05%	0	0	10	0.05%	0	0	10	0.05%	0	0	10		0.05%	9	0.9	9.1		0.05%	22	2.2	7.8
	kontrol	0	0	10	kontrol	0	0	10	kontrol	0	0	10	kontrol	0	0	10		kontrol	5	0.5	9.5		kontrol	12	1.2	8.8
	kontrol	0	0	10	kontrol	0	0	10	kontrol	0	0	10	kontrol	0	0	10		kontrol	6	0.6	9.4		kontrol	15	1.5	8.5
	kontrol	0	0	10	kontrol	0	0	10	kontrol	0	0	10	kontrol	0	0	10		kontrol	9	0.9	9.1		kontrol	12	1.2	8.8
	kontrol	0	0	10	kontrol	0	0	10	kontrol	0	0	10	kontrol	0	0	10		kontrol	10	1	9		kontrol	10	1	9
	kontrol	0	0	10	kontrol	0	0	10	kontrol	0	0	10	kontrol	0	0	10		kontrol	10	1	9		kontrol	11	1.1	8.9
	kontrol	0	0	10	kontrol	0	0	10	kontrol	0	0	10	kontrol	0	0	10		kontrol	5	0.5	9.5		kontrol	7	0.7	9.3
	kontrol	0	0	10	kontrol	0	0	10	kontrol	0	0	10	kontrol	0	0	10		kontrol	4	0.4	9.6		kontrol	7	0.7	9.3
	kontrol	0	0	10	kontrol	0	0	10	kontrol	0	0	10	kontrol	0	0	10		kontrol	0	0	10		kontrol	2	0.2	9.8
	kontrol	0	0	10	kontrol	0	0	10	kontrol	0	0	10	kontrol	0	0	10		kontrol	0	0	10		kontrol	3	0.3	9.7
	kontrol	0	0	10	kontrol	0	0	10	kontrol	0	0	10	kontrol	0	0	10		kontrol	0	0	10		kontrol	2	0.2	9.8
Syzgium bean 1 hour later					Syzgium bean 4 hours later				Syzgium bean 8 hours later				Syzgium bean 24 hours later					Syzgium bean 72 hours later					Syzgium bean 120 hours later
	Cont.	death	death	alive	Cont.	death	death	alive	Cont.	death	death	alive	Cont.	death	death	alive		Cont.	death	death	alive		Cont.	death	death	alive
	0.05	40	4	6	0.05	55	5.5	4.5	0.05	60	6	4	0.05	94.6	9.46	0.54		0.05	95.9	9.59	0.41		0.05	100	10	0
	0.05	38	3.8	6.2	0.05	68	6.8	3.2	0.05	75	7.5	2.5	0.05	94.6	9.46	0.54		0.05	95.9	9.59	0.41		0.05	100	10	0
	0.05	34.08	3.408	6.592	0.05	61	6.1	3.9	0.05	78	7.8	2.2	0.05	85	8.5	1.5		0.05	85	8.5	1.5		0.05	100	10	0
	0.05	34.08	3.408	6.592	0.05	61	6.1	3.9	0.05	78	7.8	2.2	0.05	80	8	2		0.05	95.9	9.59	0.41		0.05	100	10	0
	0.05	38	3.8	6.2	0.05	52	5.2	4.8	0.05	80	8	2	0.05	85	8.5	1.5		0.05	95.9	9.59	0.41		0.05	100	10	0
	0.05	41	4.1	5.9	0.05	55	5.5	4.5	0.05	60	6	4	0.05	90	9	1		0.05	88	8.8	1.2		0.05	100	10	0
	0.05	35	3.5	6.5	0.05	54	5.4	4.6	0.05	65	6.5	3.5	0.05	91	9.1	0.9		0.05	90	9	1		0.05	100	10	0
	0.05	35	3.5	6.5	0.05	50	5	5	0.05	67	6.7	3.3	0.05	88	8.8	1.2		0.05	91	9.1	0.9		0.05	100	10	0
	0.05	30	3	7	0.05	58	5.8	4.2	0.05	60	6	4	0.05	87	8.7	1.3		0.05	91	9.1	0.9		0.05	100	10	0
	0.05	32	3.2	6.8	0.05	62	6.2	3.8	0.05	75	7.5	2.5	0.05	88	8.8	1.2		0.05	92	9.2	0.8		0.05	100	10	0
	2.5%	20	2	8	2.5%	23	2.3	7.7	2.5%	30	3	7	2.5%	51	5.1	4.9		2.5%	70	7	3		2.5%	90	9	1
	2.5%	21	2.1	7.9	2.5%	22	2.2	7.8	2.5%	35	3.5	6.5	2.5%	55	5.5	4.5		2.5%	72	7.2	2.8		2.5%	82	8.2	1.8
	2.5%	22	2.2	7.8	2.5%	25	2.5	7.5	2.5%	35	3.5	6.5	2.5%	56	5.6	4.4		2.5%	75	7.5	2.5		2.5%	78	7.8	2.2
	2.5%	20	2	8	2.5%	26	2.6	7.4	2.5%	42	4.2	5.8	2.5%	60	6	4		2.5%	80	8	2		2.5%	88	8.8	1.2
	2.5%	19	1.9	8.1	2.5%	22	2.2	7.8	2.5%	30	3	7	2.5%	55	5.5	4.5		2.5%	65	6.5	3.5		2.5%	75	7.5	2.5
	2.5%	18	1.8	8.2	2.5%	20	2	8	2.5%	32	3.2	6.8	2.5%	50	5	5		2.5%	71	7.1	2.9		2.5%	80	8	2
	2.5%	25	2.5	7.5	2.5%	30	3	7	2.5%	31	3.1	6.9	2.5%	51	5.1	4.9		2.5%	75	7.5	2.5		2.5%	82	8.2	1.8
	2.5%	22	2.2	7.8	2.5%	25	2.5	7.5	2.5%	30	3	7	2.5%	49	4.9	5.1		2.5%	68	6.8	3.2		2.5%	85	8.5	1.5
	2.5%	21	2.1	7.9	2.5%	26	2.6	7.4	2.5%	36	3.6	6.4	2.5%	53	5.3	4.7		2.5%	67	6.7	3.3		2.5%	84	8.4	1.6
	2.5%	20	2	8	2.5%	25	2.5	7.5	2.5%	31	3.1	6.9	2.5%	55	5.5	4.5		2.5%	62	6.2	3.8		2.5%	84	8.4	1.6
	0.01	10	1	9	0.01	12	1.2	8.8	0.01	19	1.9	8.1	0.01	48	4.8	5.2		0.01	68	6.8	3.2		0.01	74	7.4	2.6
	0.01	8	0.8	9.2	0.01	10	1	9	0.01	19	1.9	8.1	0.01	45	4.5	5.5		0.01	67	6.7	3.3		0.01	73	7.3	2.7
	0.01	13.6	1.36	8.64	0.01	15	1.5	8.5	0.01	15	1.5	8.5	0.01	40	4	6		0.01	70	7	3		0.01	75	7.5	2.5
	0.01	6.8	0.68	9.32	0.01	9	0.9	9.1	0.01	15	1.5	8.5	0.01	40	4	6		0.01	65	6.5	3.5		0.01	71	7.1	2.9
	0.01	9	0.9	9.1	0.01	10	1	9	0.01	16	1.6	8.4	0.01	38	3.8	6.2		0.01	60	6	4		0.01	75	7.5	2.5
	0.01	10	1	9	0.01	10	1	9	0.01	20	2	8	0.01	39	3.9	6.1		0.01	62	6.2	3.8		0.01	70	7	3
	0.01	11	1.1	8.9	0.01	12	1.2	8.8	0.01	21	2.1	7.9	0.01	42	4.2	5.8		0.01	65	6.5	3.5		0.01	71	7.1	2.9
	0.01	12	1.2	8.8	0.01	15	1.5	8.5	0.01	22	2.2	7.8	0.01	41	4.1	5.9		0.01	68	6.8	3.2		0.01	69	6.9	3.1
	0.01	12	1.2	8.8	0.01	15	1.5	8.5	0.01	25	2.5	7.5	0.01	40	4	6		0.01	61	6.1	3.9		0.01	78	7.8	2.2
	0.01	11	1.1	8.9	0.01	13	1.3	8.7	0.01	18	1.8	8.2	0.01	40	4	6		0.01	60	6	4		0.01	80	8	2
	0.1%	10	1	9	0.1%	10	1	9	0.1%	10	1	9	0.1%	25	2.5	7.5		0.1%	55	5.5	4.5		0.1%	62	6.2	3.8
	0.1%	13.6	1.36	8.64	0.1%	14	1.4	8.6	0.1%	15	1.5	8.5	0.1%	28	2.8	7.2		0.1%	50	5	5		0.1%	59	5.9	4.1
	0.1%	9	0.9	9.1	0.1%	10	1	9	0.1%	11	1.1	8.9	0.1%	30	3	7		0.1%	51	5.1	4.9		0.1%	55	5.5	4.5
	0.1%	8	0.8	9.2	0.1%	11	1.1	8.9	0.1%	11	1.1	8.9	0.1%	32	3.2	6.8		0.1%	52	5.2	4.8		0.1%	61	6.1	3.9
	0.1%	8	0.8	9.2	0.1%	11	1.1	8.9	0.1%	11	1.1	8.9	0.1%	35	3.5	6.5		0.1%	52	5.2	4.8		0.1%	65	6.5	3.5
	0.1%	8	0.8	9.2	0.1%	11	1.1	8.9	0.1%	11	1.1	8.9	0.1%	32	3.2	6.8		0.1%	48	4.8	5.2		0.1%	52	5.2	4.8
	0.1%	5	0.5	9.5	0.1%	6	0.6	9.4	0.1%	7	0.7	9.3	0.1%	30	3	7		0.1%	48	4.8	5.2		0.1%	52	5.2	4.8
	0.1%	5	0.5	9.5	0.1%	5	0.5	9.5	0.1%	9	0.9	9.1	0.1%	32	3.2	6.8		0.1%	52	5.2	4.8		0.1%	63	6.3	3.7
	0.1%	8	0.8	9.2	0.1%	9	0.9	9.1	0.1%	11	1.1	8.9	0.1%	30	3	7		0.1%	51	5.1	4.9		0.1%	63	6.3	3.7
	0.1%	8	0.8	9.2	0.1%	9	0.9	9.1	0.1%	11	1.1	8.9	0.1%	28	2.8	7.2		0.1%	50	5	5		0.1%	60	6	4
	0.05%	0	0	10	0.05%	0	0	10	0.05%	0	0	10	0.05%	0	0	10		0.05%	15	1.5	8.5		0.05%	22	2.2	7.8
	0.05%	0	0	10	0.05%	0	0	10	0.05%	0	0	10	0.05%	0	0	10		0.05%	16	1.6	8.4		0.05%	21	2.1	7.9
	0.05%	0	0	10	0.05%	0	0	10	0.05%	0	0	10	0.05%	0	0	10		0.05%	12	1.2	8.8		0.05%	15	1.5	8.5
	0.05%	0	0	10	0.05%	0	0	10	0.05%	0	0	10	0.05%	0	0	10		0.05%	12	1.2	8.8		0.05%	15	1.5	8.5
	0.05%	0	0	10	0.05%	0	0	10	0.05%	0	0	10	0.05%	0	0	10		0.05%	11	1.1	8.9		0.05%	14	1.4	8.6
	0.05%	0	0	10	0.05%	0	0	10	0.05%	0	0	10	0.05%	0	0	10		0.05%	10	1	9		0.05%	12	1.2	8.8
	0.05%	0	0	10	0.05%	0	0	10	0.05%	0	0	10	0.05%	0	0	10		0.05%	15	1.5	8.5		0.05%	21	2.1	7.9
	0.05%	0	0	10	0.05%	0	0	10	0.05%	0	0	10	0.05%	0	0	10		0.05%	16	1.6	8.4		0.05%	20	2	8
	0.05%	0	0	10	0.05%	0	0	10	0.05%	0	0	10	0.05%	0	0	10		0.05%	12	1.2	8.8		0.05%	18	1.8	8.2
	0.05%	0	0	10	0.05%	0	0	10	0.05%	0	0	10	0.05%	0	0	10		0.05%	12	1.2	8.8		0.05%	18	1.8	8.2
	kontrol	0	0	10	kontrol	0	0	10	kontrol	0	0	10	kontrol	0	0	10		kontrol	10	1	9		kontrol	11	1.1	8.9
	kontrol	0	0	10	kontrol	0	0	10	kontrol	0	0	10	kontrol	0	0	10		kontrol	11	1.1	8.9		kontrol	11	1.1	8.9
	kontrol	0	0	10	kontrol	0	0	10	kontrol	0	0	10	kontrol	0	0	10		kontrol	12	1.2	8.8		kontrol	12	1.2	8.8
	kontrol	0	0	10	kontrol	0	0	10	kontrol	0	0	10	kontrol	0	0	10		kontrol	12	1.2	8.8		kontrol	12	1.2	8.8
	kontrol	0	0	10	kontrol	0	0	10	kontrol	0	0	10	kontrol	0	0	10		kontrol	12	1.2	8.8		kontrol	12	1.2	8.8
	kontrol	0	0	10	kontrol	0	0	10	kontrol	0	0	10	kontrol	0	0	10		kontrol	11	1.1	8.9		kontrol	11	1.1	8.9
	kontrol	0	0	10	kontrol	0	0	10	kontrol	0	0	10	kontrol	0	0	10		kontrol	10	1	9		kontrol	10	1	9
	kontrol	0	0	10	kontrol	0	0	10	kontrol	0	0	10	kontrol	0	0	10		kontrol	9	0.9	9.1		kontrol	10	1	9
	kontrol	0	0	10	kontrol	0	0	10	kontrol	0	0	10	kontrol	0	0	10		kontrol	8	0.8	9.2		kontrol	8	0.8	9.2
	kontrol	0	0	10	kontrol	0	0	10	kontrol	0	0	10	kontrol	0	0	10		kontrol	10	1	9		kontrol	10	1	9
Treatment % essentail oil (v/v)				Mean mortality (%) after
Bean				1 h	4 h	8 h	24 h	72 h	120 h
		Thyme Oil
		Control		0 ± 0.00 b	0 ± 0.00 e	0 ± 0.00 e	0 ± 0.00 e	4.90 ± 1.26 e	8.10 ± 1.46 e
		0.05%		0 ± 0.00 b	0 ± 0.00 e	0 ± 0.00 e	0 ± 0.00 e	7.90 ± 0.67 e	19.60 ± 0.61 d
		0.10%		0 ± 0.00 b	9.1 ± 0.69 d	12.50 ± 0.71 d	17.36 ± 1.88 d	29.99 ± 1.44 d	59.00 ± 1.39 c
		0.01		0 ± 0.00 b	19.30 ± 0.55 c	29.12 ± 3.08 c	36.23 ± 4.65 c	55.10 ± 1.26 c	87.30 ± 1.28 b
		2.5%		0 ± 0.00 b	43.20 ± 2.71 b	54.90 ± 1.51 b	70.90 ± 1.05 b	86.40 ± 0.96 b	90.50 ± 0.83 b
		0.05		31.66 ± 2.11a	68.80 ± 2.30 a	85.40 ± 1.95 a	88.37 ± 2.00 a	100.00 ± 0.00 a	100.00 ± 0.00 a
		d.f.		5, 54	5, 54	5, 54	5, 54	5, 54	5, 54
		F		224.62	335.29	430.16	273.02	1444.69	1341.21
		P		<,0001	<,0001	<,0001	<,0001	<,0001	<,0001
		Clove Oil
		Control		0 ± 0.00 d	0 ± 0.00 d	0 ± 0.00 e	0 ± 0.00 e	10.50 ± 0.42 e	10.70 ± 0.39 f
		0.05%		0 ± 0.00 d	0 ± 0.00 d	0 ± 0.00 e	0 ± 0.00 e	13.10 ± 0.69 e	17.60 ± 1.08 e
		0.10%		8.26 ± 0.77 c	9.60 ± 0.81 c	10.70 ± 0.63 d	30.20 ± 0.87 d	50.90 ± 0.65 d	59.20 ± 1.47 d
		0.01		10.34 ± 0.64 c	12.10 ± 0.83 c	19.00 ± 1.01 c	41.30 ± 0.95 c	64.60 ± 1.15 c	73.60 ± 1.11 c
		2.5%		20.80 ± 0.61 b	24.40 ± 0.88 b	33.20 ± 1.21 b	53.50 ± 1.05 b	70.50 ± 1.68 b	82.80 ± 1.41 b
		0.05		35.71 ± 1.10 a	57.60 ± 1.72 a	69.80 ± 2.60 a	88.32 ± 1.42 a	92.06 ± 1.21 a	100.00 ± 0.00 a
		d.f.		5, 54	5, 54	5, 54	5, 54	5, 54	5, 54
		F		435.43	571.2	434.68	1416.51	950.51	1152.72
		P		<,0001	<,0001	<,0001	<,0001	<,0001	<,0001

## Sheet: Sayfa7
Oregano tomatoes 1 hour later					Oregano tomatoes 4 hour later				Oregano tomatoes 8 hour later				Oregano tomatoes 24 hour later				Oregano tomatoes 72 hour later			Oregano tomatoes 120 hour later
	Conct.	death	gerçek		Conct.	death			Conct.	death			Conct.	death			Conct.	death		Conct.	death
	2.5%	7	0.7		2.5%	11			2.5%	38			2.5%	62			2.5%	76		2.5%	100
	2.5%	10	1		2.5%	14			2.5%	36			2.5%	68			2.5%	75		2.5%	100
	2.5%	8	0.8		2.5%	13			2.5%	39			2.5%	65			2.5%	74		2.5%	100
	2.5%	6	0.6		2.5%	13			2.5%	37			2.5%	60			2.5%	75		2.5%	100
	2.5%	6	0.6		2.5%	13			2.5%	37			2.5%	59			2.5%	72		2.5%	100
	2.5%	5	0.5		2.5%	14			2.5%	39			2.5%	58			2.5%	74		2.5%	100
	2.5%	10	1		2.5%	14			2.5%	38			2.5%	65			2.5%	74		2.5%	100
	2.5%	11	1.1		2.5%	15			2.5%	40			2.5%	58			2.5%	76		2.5%	100
	2.5%	6	0.6		2.5%	15			2.5%	41			2.5%	66			2.5%	78		2.5%	100
	2.5%	7	0.7		2.5%	12			2.5%	36			2.5%	65			2.5%	75		2.5%	100
	0.01	2			0.01	8			0.01	16			0.01	52			0.01	68		0.01	100
	0.01	3			0.01	9			0.01	17			0.01	51			0.01	69		0.01	100
	0.01	3			0.01	10			0.01	18			0.01	50			0.01	70		0.01	100
	0.01	4			0.01	10			0.01	12			0.01	49			0.01	71		0.01	100
	0.01	5			0.01	10			0.01	12			0.01	45			0.01	68		0.01	100
	0.01	3			0.01	8			0.01	13			0.01	49			0.01	67		0.01	100
	0.01	3			0.01	9			0.01	13			0.01	52			0.01	69		0.01	100
	0.01	2			0.01	9			0.01	14			0.01	52			0.01	70		0.01	100
	0.01	3			0.01	8			0.01	15			0.01	53			0.01	68		0.01	100
	0.01	4			0.01	8			0.01	15			0.01	53			0.01	70		0.01	100
	0.5%	0			0.5%	0			0.5%	0			0.5%	41			0.5%	53		0.5%	75
	0.5%	0			0.5%	0			0.5%	0			0.5%	42			0.5%	51		0.5%	72
	0.5%	0			0.5%	0			0.5%	0			0.5%	45			0.5%	56		0.5%	78
	0.5%	0			0.5%	0			0.5%	0			0.5%	40			0.5%	58		0.5%	80
	0.5%	0			0.5%	0			0.5%	0			0.5%	41			0.5%	60		0.5%	81
	0.5%	0			0.5%	0			0.5%	0			0.5%	40			0.5%	62		0.5%	80
	0.5%	0			0.5%	0			0.5%	0			0.5%	39			0.5%	55		0.5%	80
	0.5%	0			0.5%	0			0.5%	0			0.5%	38			0.5%	50		0.5%	79
	0.5%	0			0.5%	0			0.5%	0			0.5%	37			0.5%	52		0.5%	78
	0.5%	0			0.5%	0			0.5%	0			0.5%	38			0.5%	51		0.5%	79
	0.25%	0			0.25%	0			0.25%	0			0.25%	30			0.25%	43		0.25%	70
	0.25%	0			0.25%	0			0.25%	0			0.25%	32			0.25%	45		0.25%	70
	0.25%	0			0.25%	0			0.25%	0			0.25%	31			0.25%	46		0.25%	71
	0.25%	0			0.25%	0			0.25%	0			0.25%	32			0.25%	46		0.25%	75
	0.25%	0			0.25%	0			0.25%	0			0.25%	31			0.25%	45		0.25%	72
	0.25%	0			0.25%	0			0.25%	0			0.25%	33			0.25%	44		0.25%	71
	0.25%	0			0.25%	0			0.25%	0			0.25%	33			0.25%	45		0.25%	70
	0.25%	0			0.25%	0			0.25%	0			0.25%	31			0.25%	42		0.25%	69
	0.25%	0			0.25%	0			0.25%	0			0.25%	31			0.25%	42		0.25%	70
	0.25%	0			0.25%	0			0.25%	0			0.25%	30			0.25%	40		0.25%	71
	0.125%	0			0.125%	0			0.125%	0			0.125%	26			0.125%	40		0.125%	67
	0.125%	0			0.125%	0			0.125%	0			0.125%	25			0.125%	39		0.125%	66
	0.125%	0			0.125%	0			0.125%	0			0.125%	29			0.125%	38		0.125%	68
	0.125%	0			0.125%	0			0.125%	0			0.125%	28			0.125%	37		0.125%	70
	0.125%	0			0.125%	0			0.125%	0			0.125%	27			0.125%	40		0.125%	75
	0.125%	0			0.125%	0			0.125%	0			0.125%	25			0.125%	41		0.125%	65
	0.125%	0			0.125%	0			0.125%	0			0.125%	26			0.125%	41		0.125%	62
	0.125%	0			0.125%	0			0.125%	0			0.125%	26			0.125%	40		0.125%	60
	0.125%	0			0.125%	0			0.125%	0			0.125%	25			0.125%	35		0.125%	62
	0.125%	0			0.125%	0			0.125%	0			0.125%	24			0.125%	36		0.125%	61
	kontrol	0			kontrol	0			kontrol	0			kontrol	0			kontrol	10		kontrol	12
	kontrol	0			kontrol	0			kontrol	0			kontrol	0			kontrol	10		kontrol	11
	kontrol	0			kontrol	0			kontrol	0			kontrol	0			kontrol	9		kontrol	15
	kontrol	0			kontrol	0			kontrol	0			kontrol	0			kontrol	10		kontrol	11
	kontrol	0			kontrol	0			kontrol	0			kontrol	0			kontrol	9		kontrol	12
	kontrol	0			kontrol	0			kontrol	0			kontrol	0			kontrol	9		kontrol	8
	kontrol	0			kontrol	0			kontrol	0			kontrol	0			kontrol	4		kontrol	8
	kontrol	0			kontrol	0			kontrol	0			kontrol	0			kontrol	0		kontrol	0
	kontrol	0			kontrol	0			kontrol	0			kontrol	0			kontrol	0		kontrol	5
	kontrol	0			kontrol	0			kontrol	0			kontrol	0			kontrol	0		kontrol	4
Syzgium tomatoes 1 hour later					Syzgium tomatoes 4 hours later				Syzgium tomatoes 8 hours later				Syzgium tomatoes 24 hours later				Syzgium tomatoes 72 hours later			Syzgium tomatoes 120 hours later
	Conct.	death			Conct.	death			Conct.	death			Conct.	death			Conct.	death		Conct.	death
	2.5%	9			2.5%	32			2.5%	51			2.5%	75			2.5%	100		2.5%	100
	2.5%	10			2.5%	31			2.5%	50			2.5%	70			2.5%	100		2.5%	100
	2.5%	8			2.5%	30			2.5%	52			2.5%	78			2.5%	100		2.5%	100
	2.5%	8			2.5%	36			2.5%	56			2.5%	75			2.5%	100		2.5%	100
	2.5%	6			2.5%	35			2.5%	55			2.5%	80			2.5%	100		2.5%	100
	2.5%	9			2.5%	28			2.5%	58			2.5%	82			2.5%	100		2.5%	100
	2.5%	10			2.5%	27			2.5%	60			2.5%	81			2.5%	100		2.5%	100
	2.5%	11			2.5%	30			2.5%	62			2.5%	88			2.5%	100		2.5%	100
	2.5%	9			2.5%	31			2.5%	61			2.5%	87			2.5%	100		2.5%	100
	2.5%	11			2.5%	31			2.5%	60			2.5%	88			2.5%	100		2.5%	100
	0.01	5			0.01	20			0.01	38			0.01	60			0.01	78		0.01	87
	0.01	6			0.01	21			0.01	36			0.01	58			0.01	71		0.01	82
	0.01	6			0.01	21			0.01	36			0.01	56			0.01	75		0.01	86
	0.01	4			0.01	20			0.01	41			0.01	60			0.01	80		0.01	88
	0.01	5			0.01	22			0.01	30			0.01	55			0.01	80		0.01	89
	0.01	5			0.01	20			0.01	32			0.01	50			0.01	71		0.01	84
	0.01	5			0.01	22			0.01	30			0.01	52			0.01	75		0.01	84
	0.01	5			0.01	25			0.01	30			0.01	53			0.01	82		0.01	85
	0.01	4			0.01	26			0.01	35			0.01	53			0.01	81		0.01	89
	0.01	5			0.01	25			0.01	36			0.01	55			0.01	81		0.01	89
	0.5%	0			0.5%	8			0.5%	9			0.5%	26			0.5%	52		0.5%	74
	0.5%	0			0.5%	9			0.5%	12			0.5%	31			0.5%	51		0.5%	70
	0.5%	0			0.5%	9			0.5%	11			0.5%	30			0.5%	50		0.5%	68
	0.5%	0			0.5%	9			0.5%	9			0.5%	32			0.5%	55		0.5%	68
	0.5%	0			0.5%	7			0.5%	13			0.5%	30			0.5%	56		0.5%	75
	0.5%	0			0.5%	6			0.5%	16			0.5%	30			0.5%	50		0.5%	71
	0.5%	0			0.5%	8			0.5%	12			0.5%	29			0.5%	52		0.5%	70
	0.5%	0			0.5%	10			0.5%	12			0.5%	38			0.5%	51		0.5%	69
	0.5%	0			0.5%	10			0.5%	13			0.5%	40			0.5%	51		0.5%	78
	0.5%	0			0.5%	11			0.5%	15			0.5%	40			0.5%	56		0.5%	80
	0.25%	0			0.25%	0			0.25%	5			0.25%	20			0.25%	58		0.25%	60
	0.25%	0			0.25%	0			0.25%	5			0.25%	21			0.25%	58		0.25%	61
	0.25%	0			0.25%	0			0.25%	5			0.25%	20			0.25%	51		0.25%	62
	0.25%	0			0.25%	0			0.25%	8			0.25%	22			0.25%	52		0.25%	60
	0.25%	0			0.25%	0			0.25%	10			0.25%	23			0.25%	52		0.25%	58
	0.25%	0			0.25%	0			0.25%	10			0.25%	22			0.25%	55		0.25%	58
	0.25%	0			0.25%	0			0.25%	6			0.25%	25			0.25%	55		0.25%	57
	0.25%	0			0.25%	0			0.25%	8			0.25%	22			0.25%	56		0.25%	63
	0.25%	0			0.25%	0			0.25%	9			0.25%	28			0.25%	57		0.25%	63
	0.25%	0			0.25%	0			0.25%	9			0.25%	20			0.25%	50		0.25%	60
	0.125%	0			0.125%	0			0.125%	0			0.125%	9			0.125%	32		0.125%	35
	0.125%	0			0.125%	0			0.125%	0			0.125%	12			0.125%	31		0.125%	32
	0.125%	0			0.125%	0			0.125%	0			0.125%	15			0.125%	31		0.125%	31
	0.125%	0			0.125%	0			0.125%	0			0.125%	11			0.125%	31		0.125%	36
	0.125%	0			0.125%	0			0.125%	0			0.125%	16			0.125%	30		0.125%	36
	0.125%	0			0.125%	0			0.125%	0			0.125%	16			0.125%	29		0.125%	35
	0.125%	0			0.125%	0			0.125%	0			0.125%	15			0.125%	28		0.125%	35
	0.125%	0			0.125%	0			0.125%	0			0.125%	12			0.125%	32		0.125%	38
	0.125%	0			0.125%	0			0.125%	0			0.125%	11			0.125%	33		0.125%	32
	0.125%	0			0.125%	0			0.125%	0			0.125%	10			0.125%	35		0.125%	38
	kontrol	0			kontrol	0			kontrol	0			kontrol	0			kontrol	3		kontrol	3
	kontrol	0			kontrol	0			kontrol	0			kontrol	0			kontrol	10		kontrol	12
	kontrol	0			kontrol	0			kontrol	0			kontrol	0			kontrol	11		kontrol	12
	kontrol	0			kontrol	0			kontrol	0			kontrol	0			kontrol	11		kontrol	13
	kontrol	0			kontrol	0			kontrol	0			kontrol	0			kontrol	11		kontrol	14
	kontrol	0			kontrol	0			kontrol	0			kontrol	0			kontrol	12		kontrol	12
	kontrol	0			kontrol	0			kontrol	0			kontrol	0			kontrol	15		kontrol	15
	kontrol	0			kontrol	0			kontrol	0			kontrol	0			kontrol	9		kontrol	9
	kontrol	0			kontrol	0			kontrol	0			kontrol	0			kontrol	8		kontrol	8
	kontrol	0			kontrol	0			kontrol	0			kontrol	0			kontrol	11		kontrol	11
Treatment % essentail oil (v/v)				Mean mortality (%) after								Treatment % essentail oil (v/v)				Mean mortality (%) after
Bean				1 h	4 h	8 h	24 h	72 h	120 h			Tomato				1 h	4 h	8 h	24 h	72 h	120 h
		Thyme Oil												Thyme Oil
		Control		0 ± 0.00 b	0 ± 0.00 e	0 ± 0.00 e	0 ± 0.00 e	4.90 ± 1.26 e	8.10 ± 1.46 e					Control		0 ± 0.00 c	0 ± 0.00 c	0 ± 0.00 c	0 ± 0.00 f	6.10 ± 1.44 f	8.60 ± 1.43 e
		0.05%		0 ± 0.00 b	0 ± 0.00 e	0 ± 0.00 e	0 ± 0.00 e	7.90 ± 0.67 e	19.60 ± 0.61 d					0.125%		0 ± 0.00 c	0 ± 0.00 c	0 ± 0.00 c	26.10 ± 0.48 e	38.70 ± 0.66 e	65.60 ± 1.46 d
		0.10%		0 ± 0.00 b	9.1 ± 0.69 d	12.50 ± 0.71 d	17.36 ± 1.88 d	29.99 ± 1.44 d	59.00 ± 1.39 c					0.25 %		0 ± 0.00 c	0 ± 0.00 c	0 ± 0.00 c	31.40 ± 0.33 d	43.80 ± 0.62 d	70.90 ± 0.52 c
		0.01		0 ± 0.00 b	19.30 ± 0.55 c	29.12 ± 3.08 c	36.23 ± 4.65 c	55.10 ± 1.26 c	87.30 ± 1.28 b					0.5 %		0 ± 0.00 c	0 ± 0.00 c	0 ± 0.00 c	40.10 ± 0.73 c	54.80 ± 1.30 c	78.20 ± 0.86 b
		2.5%		0 ± 0.00 b	43.20 ± 2.71 b	54.90 ± 1.51 b	70.90 ± 1.05 b	86.40 ± 0.96 b	90.50 ± 0.83 b					0.01		3.20 ± 0.29 b	8.90 ± 0.27 b	14.50 ± 0.65 b	50.60 ± 0.77 b	69.00 ± 0.39 b	100.00 ± 0.83 a
		0.05		31.66 ± 2.11a	68.80 ± 2.30 a	85.40 ± 1.95 a	88.37 ± 2.00 a	100.00 ± 0.00 a	100.00 ± 0.00 a					2.5 %		7.60 ± 0.65 a	13.40 ± 0.40 a	38.10 ± 0.52 a	62.60 ± 1.15 a	74.90 ± 0.50 a	100.00 ± 0.00 a
		d.f.		5, 54	5, 54	5, 54	5, 54	5, 54	5, 54					d.f.		5, 54	5, 54	5, 54	5, 54	5, 54	5, 54
		F		224.62	335.29	430.16	273.02	1444.69	1341.21					F		114.01	891.82	2045413	994.52	731.88	1295.99
		P		<,0001	<,0001	<,0001	<,0001	<,0001	<,0001					P		<,0001	<,0001	<,0001	<,0001	<,0001	<,0001
		Clove Oil												Clove Oil
		Control		0 ± 0.00 d	0 ± 0.00 d	0 ± 0.00 e	0 ± 0.00 e	10.50 ± 0.42 e	10.70 ± 0.39 f					Control		0 ± 0.00 c	0 ± 0.00 d	0 ± 0.00 e	0 ± 0.00 f	10.10 ± 0.98 e	10.90 ± 1.10 f
		0.05%		0 ± 0.00 d	0 ± 0.00 d	0 ± 0.00 e	0 ± 0.00 e	13.10 ± 0.69 e	17.60 ± 1.08 e					0.125%		0 ± 0.00 c	0 ± 0.00 d	0 ± 0.00 e	12.70 ± 0.81 e	31.20 ± 0.62 d	34.80 ± 0.77 e
		0.10%		8.26 ± 0.77 c	9.60 ± 0.81 c	10.70 ± 0.63 d	30.20 ± 0.87 d	50.90 ± 0.65 d	59.20 ± 1.47 d					0.25 %		0 ± 0.00 c	0 ± 0.00 d	7.50 ± 0.65 d	22.30 ± 0.80 d	52.40 ± 0.93 c	60.20 ± 0.66 d
		0.01		10.34 ± 0.64 c	12.10 ± 0.83 c	19.00 ± 1.01 c	41.30 ± 0.95 c	64.60 ± 1.15 c	73.60 ± 1.11 c					0.5 %		0 ± 0.00 c	8.70 ± 0.47 c	12.20 ± 0.71 c	32.60 ± 1.55 c	52.40 ± 0.74 c	72.30 ± 1.34 c
		2.5%		20.80 ± 0.61 b	24.40 ± 0.88 b	33.20 ± 1.21 b	53.50 ± 1.05 b	70.50 ± 1.68 b	82.80 ± 1.41 b					0.01		5.00 ± 0.21 b	22.20 ± 0.72 b	34.40 ± 1.19 b	55.20 ± 1.06 b	77.40 ± 1.30 b	86.30 ± 0.78 b
		0.05		35.71 ± 1.10 a	57.60 ± 1.72 a	69.80 ± 2.60 a	88.32 ± 1.42 a	92.06 ± 1.21 a	100.00 ± 0.00 a					2.5 %		9.10 ± 0.48 a	31.10 ± 0.87 a	56.50 ± 1.38 a	80.40 ± 1.92 a	100.00 ± 0.00 a	100.00 ± 0.00 a
		d.f.		5, 54	5, 54	5, 54	5, 54	5, 54	5, 54					d.f.		5, 54	5, 54	5, 54	5, 54	5, 54	5, 54
		F		435.43	571.2	434.68	1416.51	950.51	1152.72					F		323.89	707.67	713.073	608.19	1361.1	1409.55
		P		<,0001	<,0001	<,0001	<,0001	<,0001	<,0001					P		<,0001	<,0001	<,0001	<,0001	<,0001	<,0001
