# Supplementary material for: Potential use of essential oils from Origanum vulgare and Syzygium aromaticum to control Tetranychus urticae Koch (Acari: Tetranychidae) on two host plant species
Source: PeerJ. 2023 Jan 20;11:e14475. doi: 10.7717/peerj.14475 (PMC9869773; doi:10.7717/peerj.14475)
Supplement: Supplemental Information 3 [file peerj-11-14475-s003.xlsx]

## Sheet: Sayfa1
	1 day	3 days	5 days	larvae
0.05	2	3	3	3
0.05	0	1	1	0
0.05	2	3	4	2
0.05	0	2	3	2
0.05	2	4	5	2
0.05	0	0	0	0
2.5%	3	5	10	9
2.5%	2	5	7	5
2.5%	3	3	5	3
2.5%	1	4	6	2
2.5%	3	3	4	2
2.5%	2	5	9	5				1 day	3 days	5 days	larvae
0.01	3	5	10	9			control	15	25	34	31
0.01	4	9	11	5				12	18	26	25
0.01	2	5	7	3				13	21	32	30
0.01	3	6	9	6				18	32	41	38
0.01	2	4	8	4				10	30	39	35
0.01	3	7	11	9				10	25	35	35
0.1%	6	15	20	20				13	25.1667	34.5	32.3333
0.1%	5	10	15	11
0.1%	7	10	15	10
0.1%	5	12	19	15
0.1%	3	9	12	10
0.1%	3	9	15	10
kontrol	15	25	34	31
kontrol	12	18	26	25
kontrol	13	21	32	30
kontrol	18	32	41	38
kontrol	10	30	39	35
kontrol	10	25	35	35

## Sheet: Sayfa2
bean syzygium
		1 day	3 days	5 days	larvae
	0.05	4	6	7	5
	0.05	6	7	7	4
	0.05	8	8	9	5
	0.05	8	8	10	5
	0.05	7	7	8	5
	0.05	6	6	7	3
	2.5%	8	8	7	3
	2.5%	8	8	10	5
	2.5%	9	9	11	8
	2.5%	10	10	12	7
	2.5%	12	12	15	10
	2.5%	13	13	13	10
	0.01	10	15	21	20
	0.01	8	12	19	15
	0.01	13	15	16	10
	0.01	14	15	20	15
	0.01	13	16	20	15
	0.01	10	17	21	12
	0.1%	15	20	25	18
	0.1%	10	15	21	20
	0.1%	16	17	22	15
	0.1%	18	18	23	15
	0.1%	15	21	25	10
	0.1%	17	22	25	15
	control	20	28	35	30
	control	12	29	30	28
	control	15	32	33	30
	control	20	30	42	40
	control	15	29	39	35
	control	15	31	35	32
		16.1667	29.8333	35.6667	32.5

## Sheet: Sayfa3
						tomato oregano
								1 day	3 days	5 days		larvae
							2.5%	1	1	1		0
							2.5%	1	1	1		0
							2.5%	2	2	2		0
							2.5%	0	0	0		0
							2.5%	1	1	0		0
							2.5%	1	1	0		0
								1	1	0.666667		0
							0.01	3	3	2		0
							0.01	3	3	2		1
							0.01	2	2	1		1
							0.01	2	2	2		1
							0.01	3	3	3		0
							0.01	2	2	2		0
								2.5	2.5	2		0.5
							0.5%	7	10	16		12
							0.5%	8	12	12		12
							0.5%	8	12	15		10
							0.5%	9	10	15		9
							0.5%	8	11	14		6
							0.5%	9	11	15		11
								8.16667	11	14.5		10
	1 day	3 days	5 days	larvae			0.25%	10	16	22		18
control	15	20	32	30			0.25%	12	15	19		12
	14	22	25	20			0.25%	9	13	20		15
	14	21	30	28			0.25%	13	16	19		14
	15	33	43	40			0.25%	12	16	21		20
	15	31	40	35			0.25%	13	15	22		20
	11	26	27	26				11.5	15.1667	20.5		16.5
	14	25.5	32.8333	29.8333

## Sheet: Sayfa4
	tomato syzygium
				1 day	3 days	5 days		larvae
			2.5%	1	1	1		0
			2.5%	1	1	2		0
			2.5%	0	0	2		0
			2.5%	0	1	0		0
			2.5%	0	1	1		0
			2.5%	1	1	0		0
				0.5	0.833333	1		0
			0.01	1	3	2		1
			0.01	1	3	3		2
			0.01	2	2	3		2
			0.01	2	2	3		2
			0.01	2	3	3		3
			0.01	1	3	3		2
				1.5	2.66667	2.83333		2
			0.5%	3	5	5		2
			0.5%	3	4	6		3
			0.5%	3	7	10		5
			0.5%	3	8	9		5
			0.5%	3	6	8		4
			0.5%	3	7	9		5
				3	6.16667	7.83333		4
			0.25%	12	16	22		18
			0.25%	13	17	23		18
			0.25%	15	18	21		16
			0.25%	12	15	20		15
			0.25%	13	16	22		21
			0.25%	14	17	24		20
				13.1667	16.5	22		18
				1 day	3 days	5 days	larvae
			control	16	26	35	32
				15	22	26	25
				15	33	35	30
				15	31	45	40
				15	31	45	42
				14	25	36	30
				15	28	37	33.1667
